# Supplementary material for: Highly proton conducting MoS2/graphene oxide nanocomposite based chemoresistive humidity sensor
Source: Royal Society of Chemistry journal article supplement (doi:10.1039/c6ra11961a), 2016-01-01
Supplement: c6ra11961a1.pdf [file c6ra11961a1.pdf]

## *Electronic Supporting Information*

### **Highly Proton Conducting MoS<sub>2</sub>/Graphene oxide Nano-composite based Chemoresistive Humidity Sensor†**

Debasree Burman<sup>a</sup>, Ruma Ghosh<sup>a</sup>, Sumita Santra<sup>b</sup> and Prasanta K. Guha<sup>\*a</sup>

<sup>a</sup>Department of Electronics and Electrical Communication Engineering, Indian Institute of Technology, Kharagpur, W. B. 721 302, India

<sup>b</sup> Department of Physics, Indian Institute of Technology, Kharagpur, W. B. 721 302, India

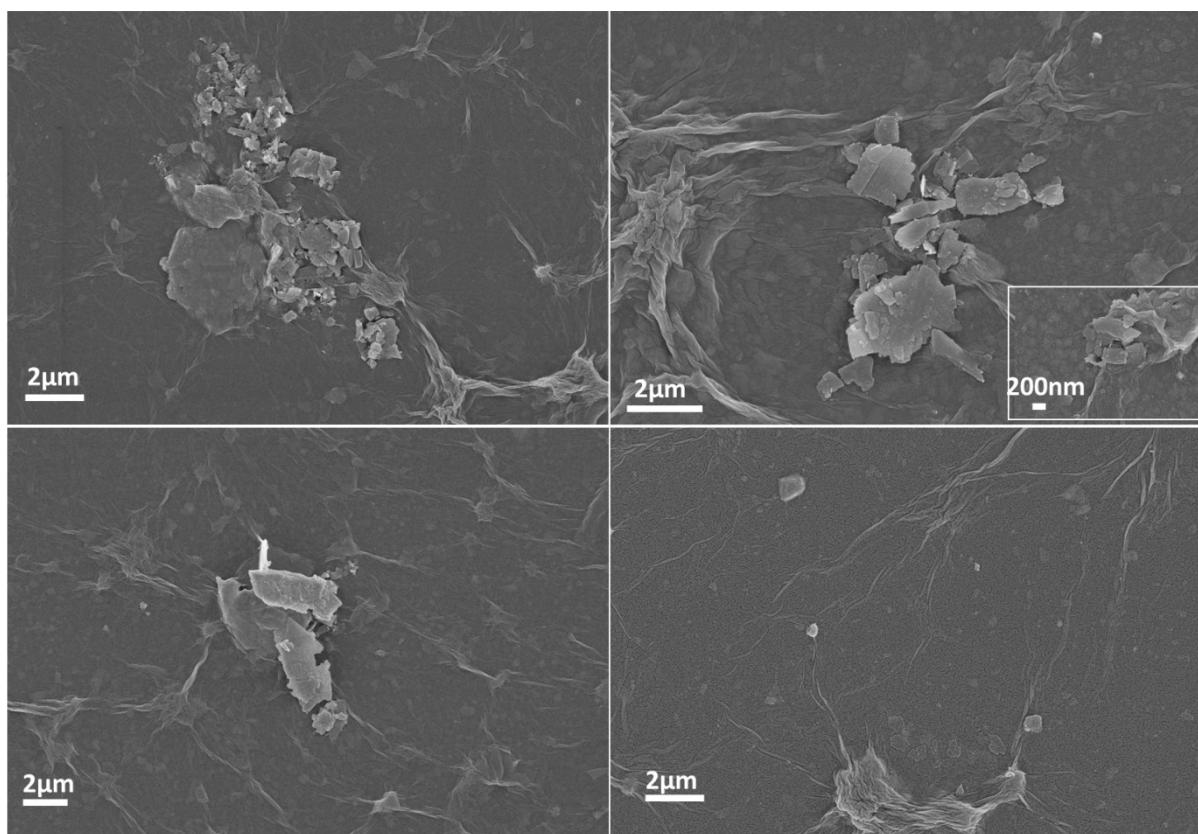

Figure S1: SEM images of MoS<sub>2</sub>/GO composites (a) 1:0.5 (b) 1:4 (c) 1: 6 (d) 1:8.

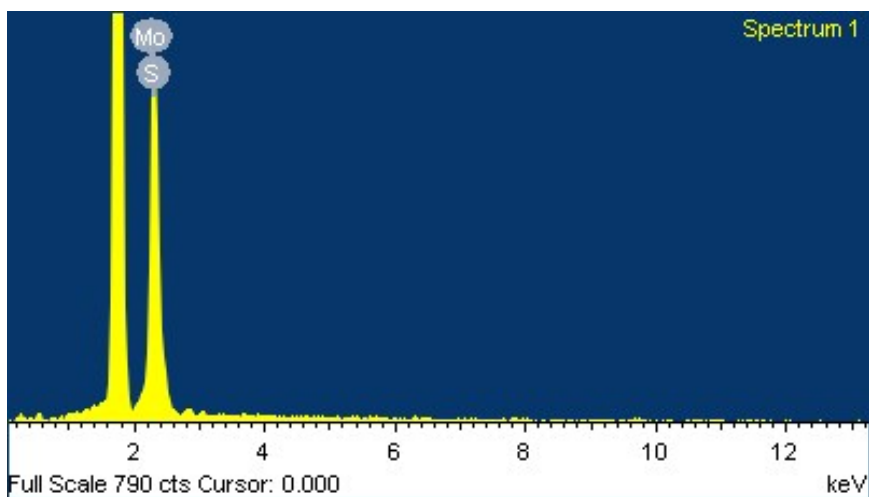

Figure S2: EDAX of 8 hours sonicated MoS<sub>2</sub> flakes.

Table S1: EDAX of MoS<sub>2</sub> nanoflakes.

| <b>Element</b> | <b>Weight<br/>%</b> | <b>Atomic<br/>%</b> |
|----------------|---------------------|---------------------|
|                |                     |                     |
| <b>S K</b>     | 33.86               | 60.50               |
| <b>Mo L</b>    | 66.14               | 39.50               |

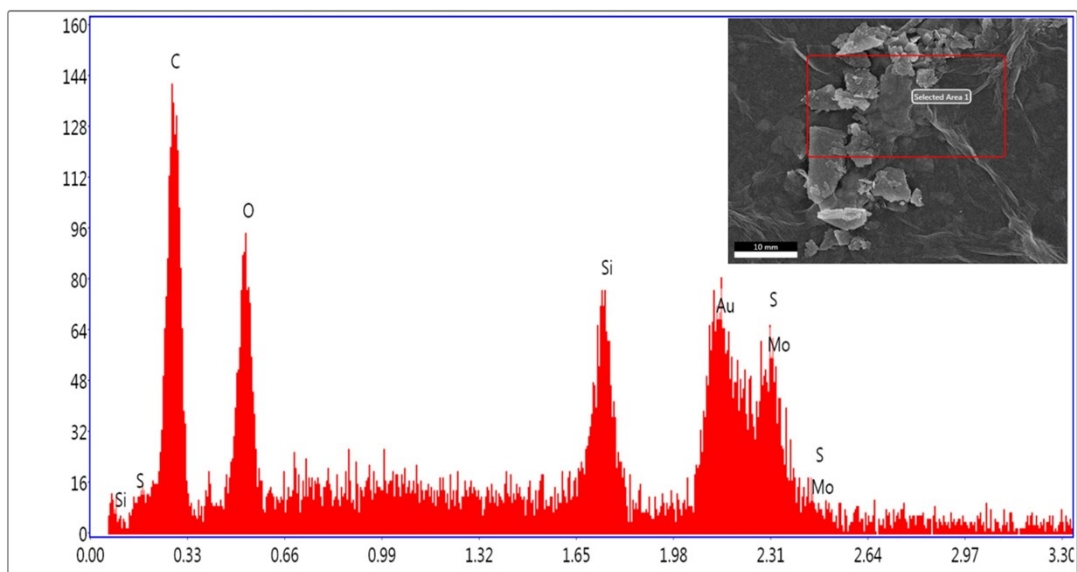

Figure S3: EDAX of MoS<sub>2</sub>/GO 1:4 composite.

Table S2: EDAX of MoS<sub>2</sub>/GO 1:4 composite.

| Element | Weight % | Atomic % |
|---------|----------|----------|
| C K     | 16.55    | 48.50    |
| O K     | 6.61     | 14.53    |
| SiK     | 9.63     | 12.06    |
| AuM     | 41.97    | 7.50     |
| MoL     | 14.07    | 5.16     |
| S K     | 11.17    | 12.26    |

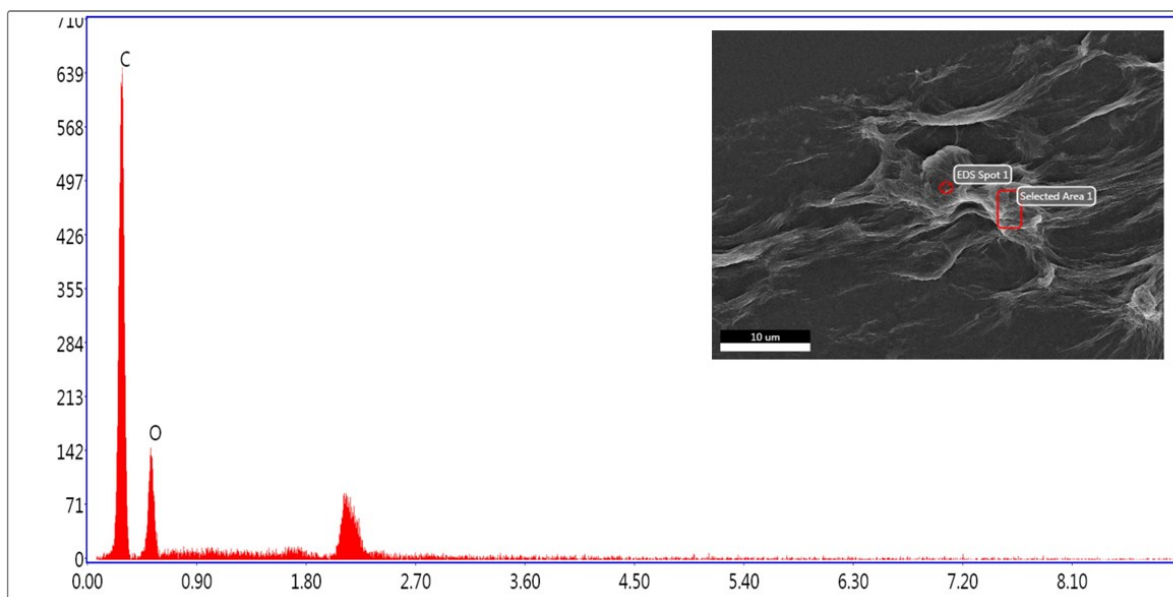

Figure S4: EDAX of GO sheets.

Table S3: EDAX of GO sheets.

| Element | Weight % | Atomic % |
|---------|----------|----------|
| C K     | 72.82    | 78.11    |
| O K     | 27.18    | 21.89    |

The XPS characterisation was carried out for the 2 hours and 8 hours sonicated sample to investigate the presence of S-vacancies in the samples. The XPS spectra were calibrated with the C 1s peak at 284.5 eV as reference. The small peak at 226.3 eV characterizes the S 2s peak. The Mo<sup>4+</sup> 3d<sub>5/2</sub> and 3d<sub>3/2</sub> peaks were de-convoluted into two sets of components—the first one being located at 229.23 eV and 232.26 eV and the second set located at 228.87 eV and 231.9 eV . The first set of components corresponds to intrinsic MoS<sub>2</sub> (i-MoS<sub>2</sub>) and the second set, at a slightly lower binding energy shows the presence of defective MoS<sub>2</sub> (d-MoS<sub>2</sub>) with sulphur (S) vacancies<sup>1, 2, 3</sup>. It was also observed that with increase in sonication time from 2 hours to 8 hours, the intensity of d-MoS<sub>2</sub> increases. So it can be concluded that

the number of S-vacancy sites increased with increase in sonication time as the d-MoS<sub>2</sub> peaks were directly associated with S-vacancies <sup>2</sup>.

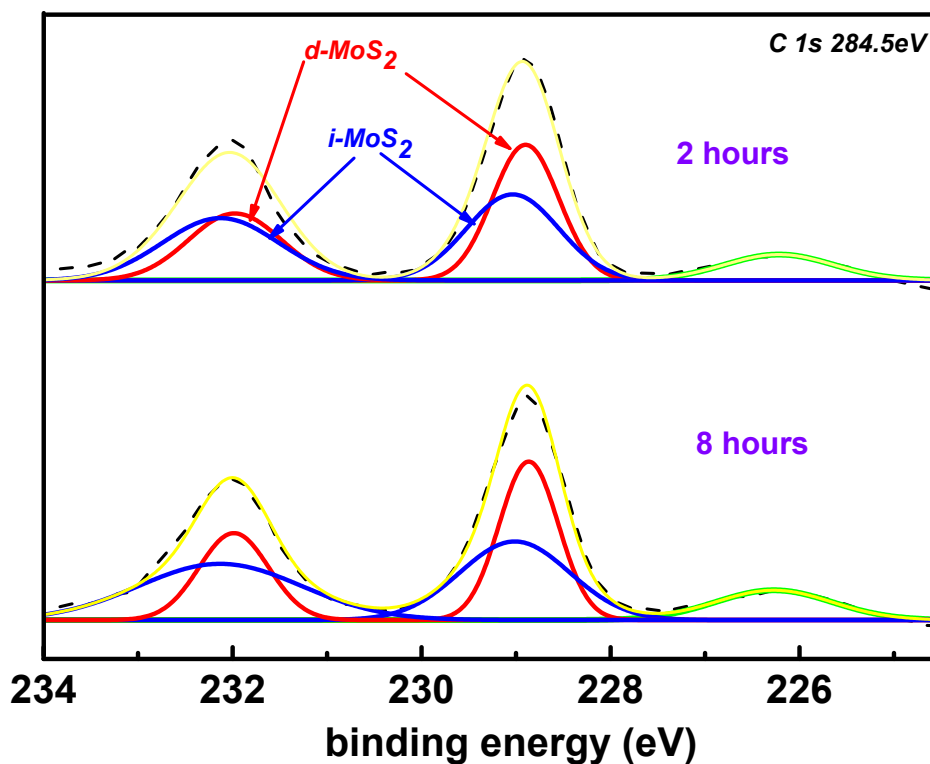

Figure S5: Mo-3d XPS spectra of 2 hours and 8 hours sonicated MoS<sub>2</sub> samples.

The poor response of the 12 hours sonicated sample can be attributed to the agglomeration of the nanoflakes (Figure S6) due to the high energy generated during sonication.

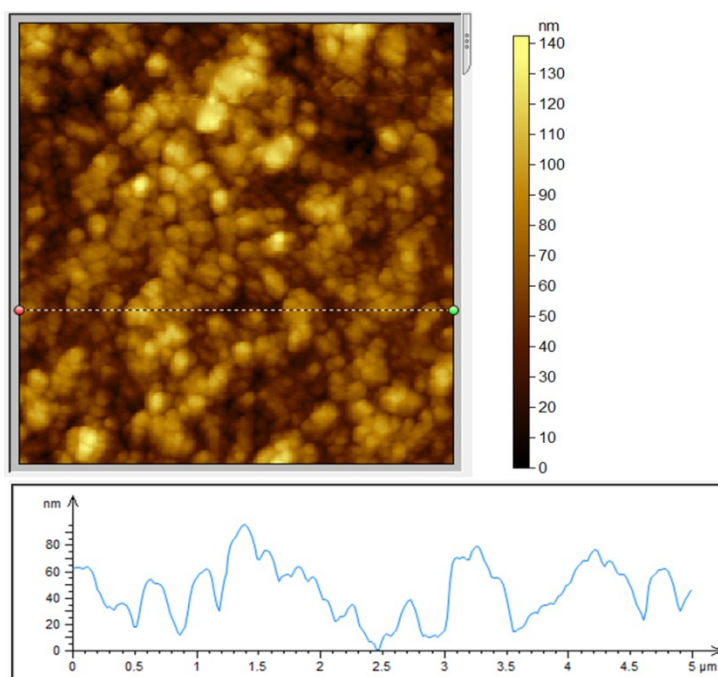

Figure S6: AFM image of 12 hours sonicated MoS<sub>2</sub> sample showing agglomeration

## REFERENCES

1. D. M. Sim, M. Kim, S. Yim, M.-J. Choi, J. Choi, S. Yoo and Y. S. Jung, *ACS Nano*, 2015.
2. I. S. Kim, V. K. Sangwan, D. Jariwala, J. D. Wood, S. Park, K.-S. Chen, F. Shi, F. Ruiz-Zepeda, A. Ponce, M. Jose-Yacamán, V. P. Dravid, T. J. Marks, M. C. Hersam and L. J. Lauhon, *ACS Nano*, 2014, **8**, 10551-10558.
3. M. Quan, M. O. Patrick, M. John, L. Duy, S. W. Chen, Z. Yeming, C. Tianyang, S. Dezheng, Y. Koichi, T. Tai, W. Michelle, L. M. Jessica, W. Jonathan, M. KatieMarie, F. H. Tony, S. R. Talat, K. Roland and B. Ludwig, *Journal of Physics: Condensed Matter*, 2013, **25**, 252201.
